# Supplementary material for: Non-classical amine recognition evolved in a large clade of olfactory receptors
Source: eLife journal article supplement (doi:10.7554/elife.10441), 2015-10-31
Supplement: supp [file elife_poa_e10441_Figure_2_figure_supplement_1.pdf › elife_poa_e10441_Figure_2_figure_supplement_1.pdf]

# B

| Receptors | Species             | Number of receptors | X=Asp | X=Glu | X=Asp<br>Y=Asp | Y=Asp | Other |
|-----------|---------------------|---------------------|-------|-------|----------------|-------|-------|
| TAARs     | Mouse (Mm)          | 15                  | 13    | 2     | 2*             | 2*    | 0     |
| TAARs     | Rat (Rn)            | 17                  | 15    | 2     | 2*             | 2*    | 0     |
| TAARs     | Human (Hs)          | 6                   | 6     | 0     | 2*             | 2*    | 0     |
| TAARs     | Opossum (Md)        | 19                  | 19    | 0     | 5*             | 5*    | 0     |
| TAARs     | Cow (Bt)            | 13                  | 12    | 1     | 2*             | 2*    | 0     |
| TAARs     | Chicken (Gg)        | 3                   | 3     | 0     | 0              | 0     | 0     |
| TAARs     | Frog (Xt)           | 3                   | 3     | 0     | 0              | 0     | 0     |
| TAARs     | Coelacanth (Lc)     | 18                  | 16    | 0     | 10*            | 12*   | 0     |
| TAARs     | Zebrafish (Dr)      | 112                 | 27    | 0     | 7              | 91    | 1     |
| TAARs     | Medaka (Ol)         | 25                  | 7     | 0     | 1              | 19    | 0     |
| TAARs     | Stickleback (Ga)    | 48                  | 13    | 0     | 6              | 41    | 0     |
| TAARs     | Tetraodon (Tn)      | 18                  | 5     | 0     | 0              | 9     | 4     |
| TAARs     | Fugu (Tr)           | 18                  | 5     | 0     | 0              | 11    | 2     |
| TAARs     | Salmon (Ss)         | 27                  | 6     | 0     | 1              | 16    | 6     |
| TAARs     | Elephant shark (Cm) | 2                   | 2     | 0     | 1              | 1     | 0     |

# B

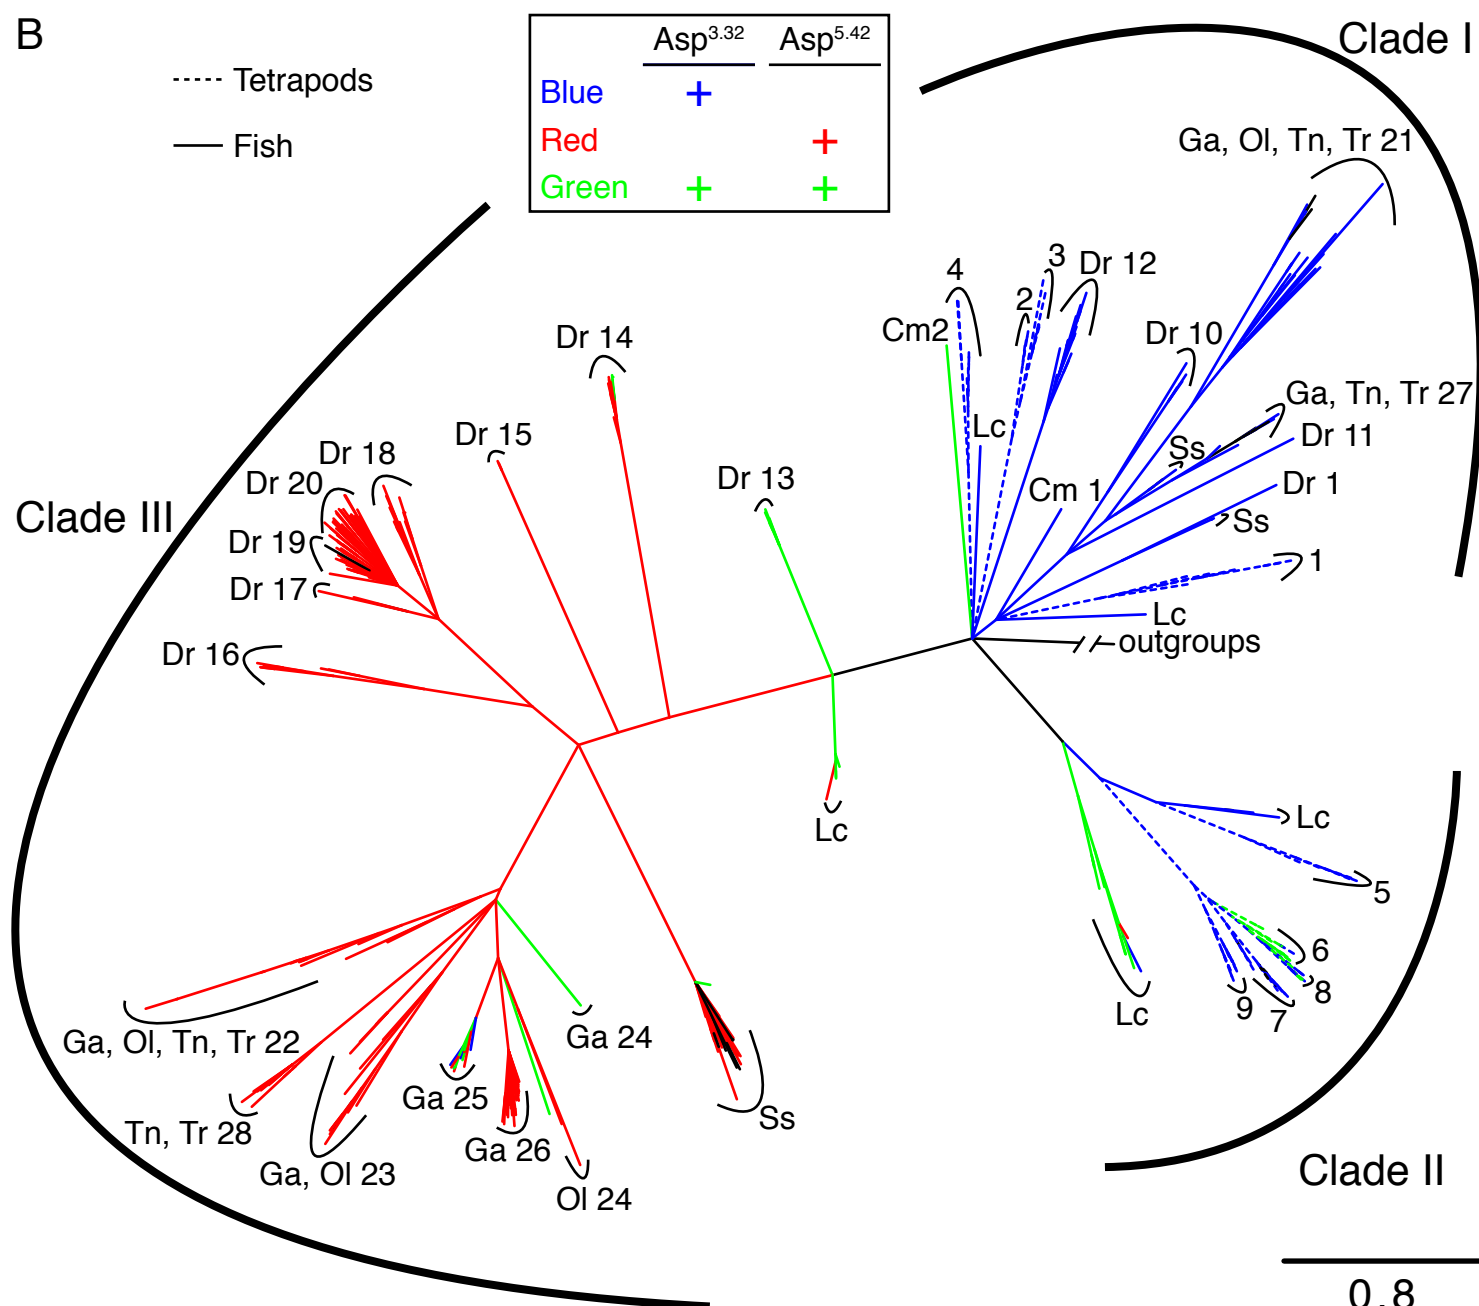

Figure 2-figure supplement 1
