# Supplementary figures and images for: Non-classical amine recognition evolved in a large clade of olfactory receptors
Source: eLife journal article supplement (doi:10.7554/elife.10441), 2015-10-31

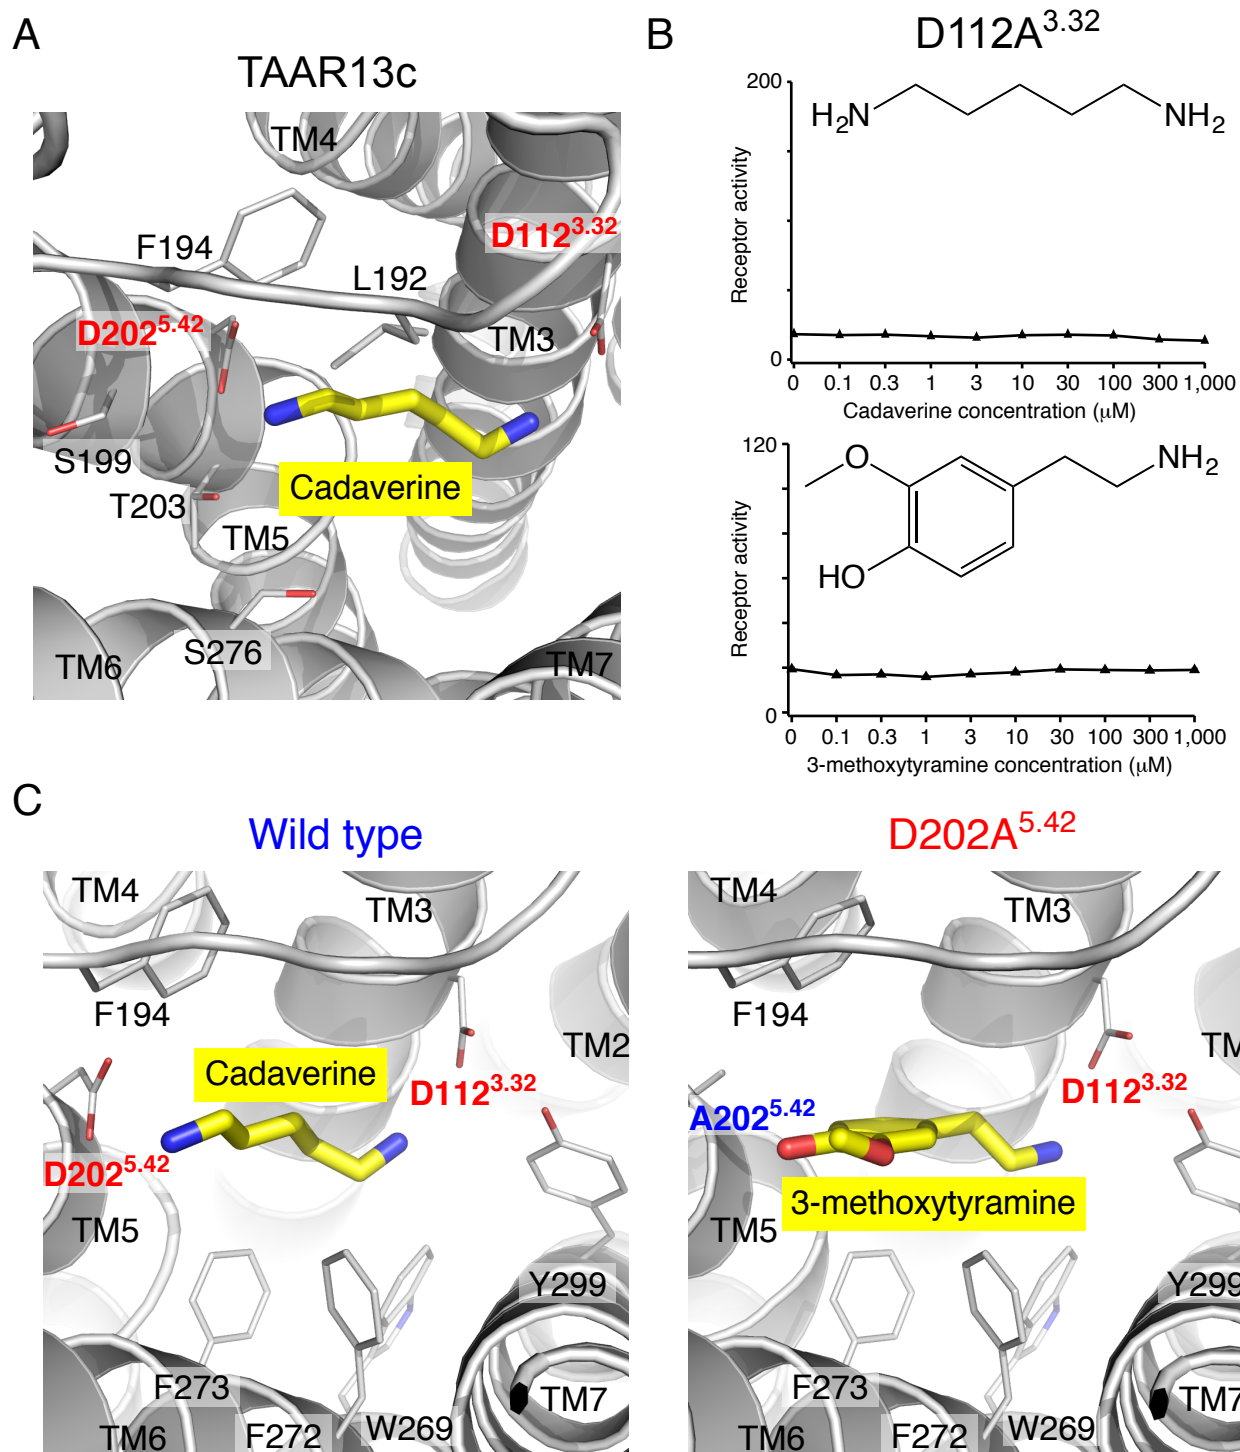

Figure 1-figure supplement 1

Supplement: supp [file elife_poa_e10441_Figure_1_figure_supplement_1.pdf › elife_poa_e10441_Figure_1_figure_supplement_1.pdf]

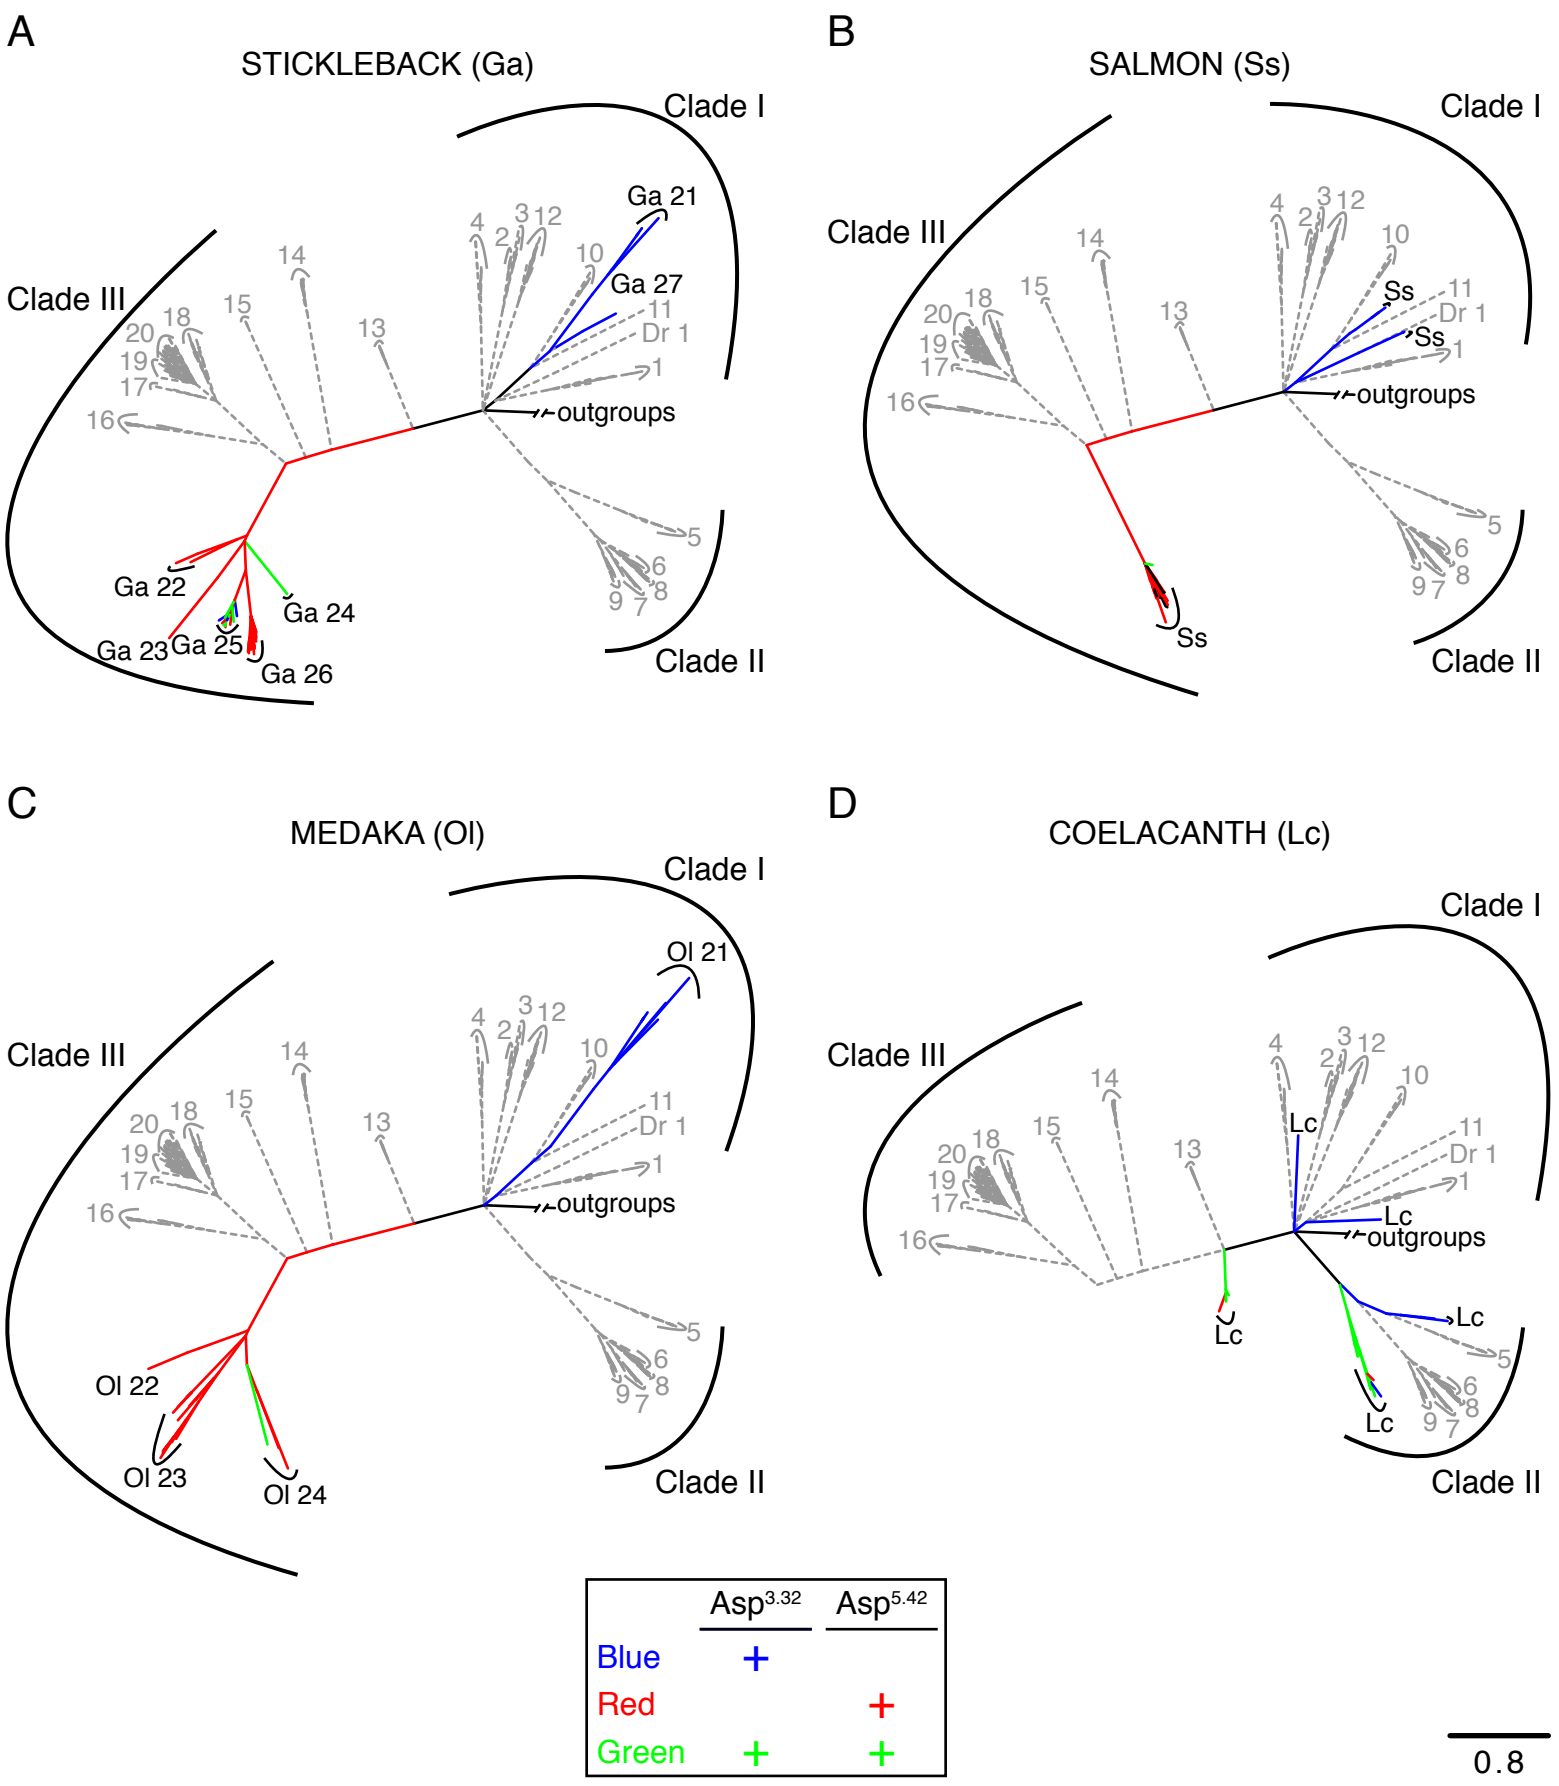

Figure 2-figure supplement 2

Supplement: supp [file elife_poa_e10441_Figure_2_figure_supplement_2.pdf › elife_poa_e10441_Figure_2_figure_supplement_2.pdf]

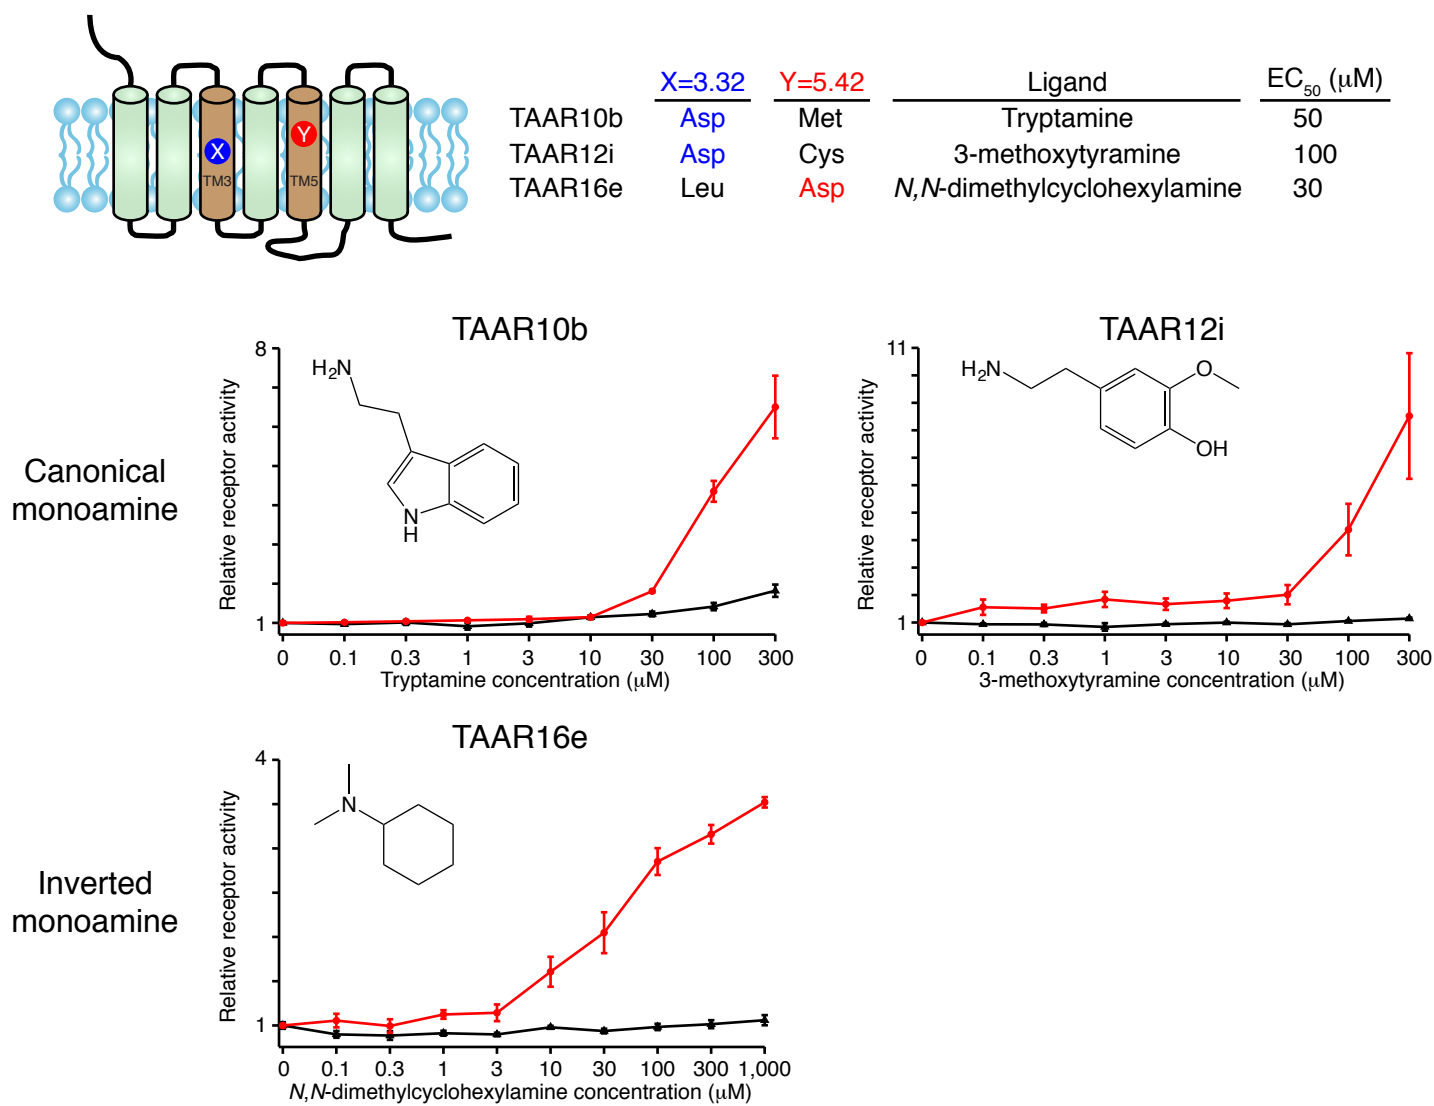

Figure 3-figure supplement 1

Supplement: supp [file elife_poa_e10441_Figure_3_figure_supplement_1.pdf › elife_poa_e10441_Figure_3_figure_supplement_1.pdf]

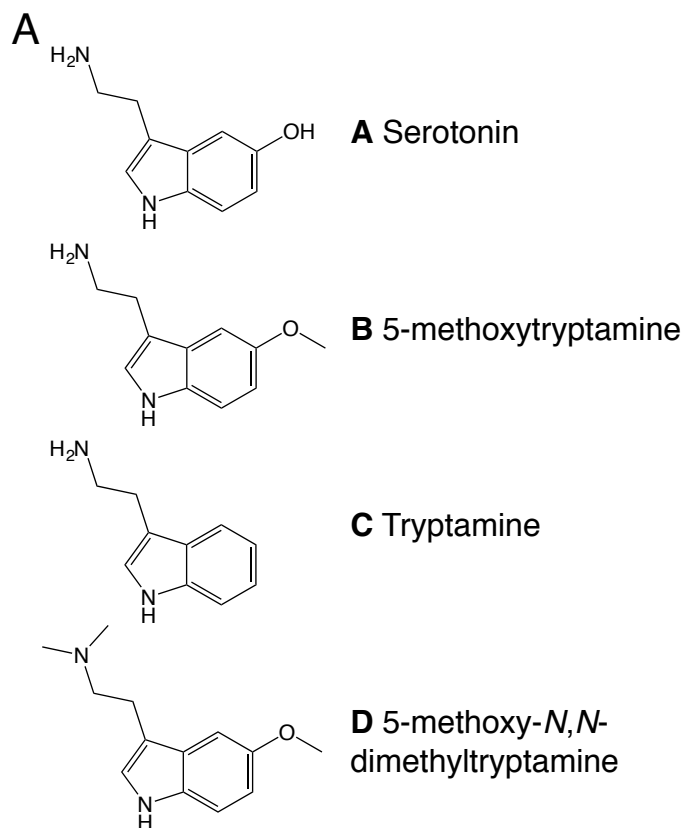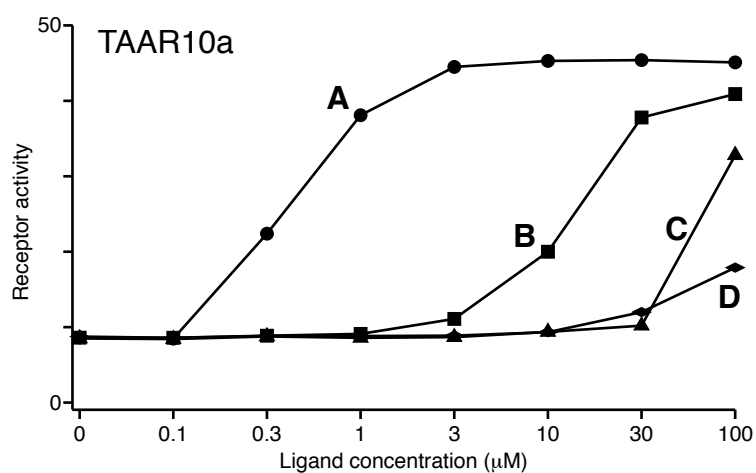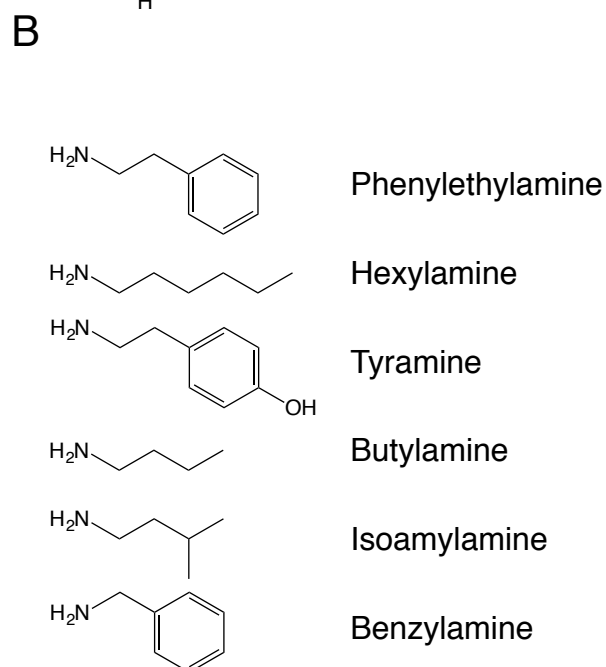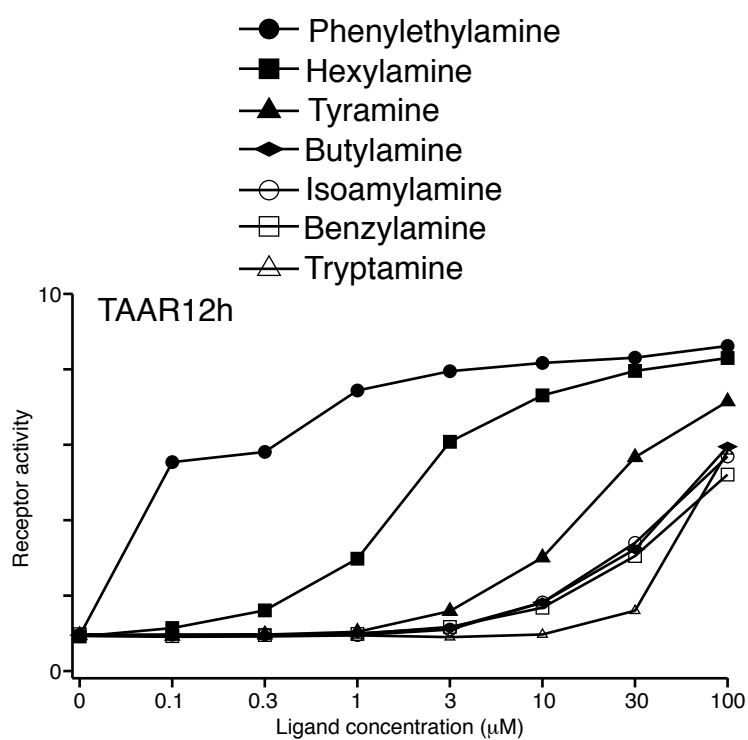

Figure 3-figure supplement 2

Supplement: supp [file elife_poa_e10441_Figure_3_figure_supplement_2.pdf › elife_poa_e10441_Figure_3_figure_supplement_2.pdf]

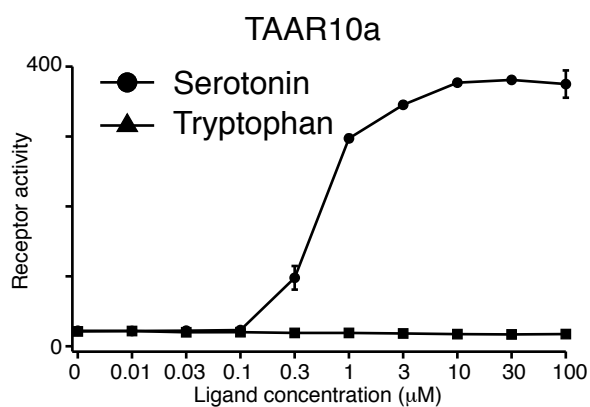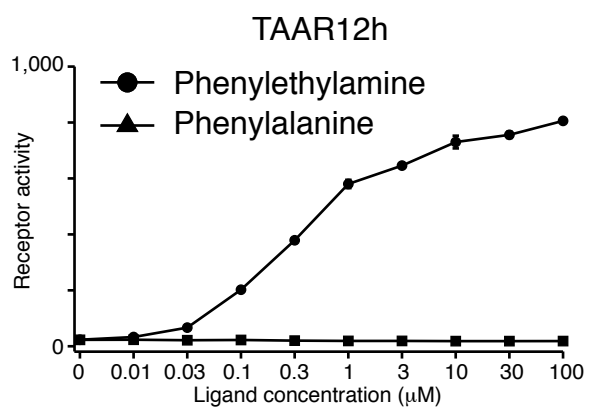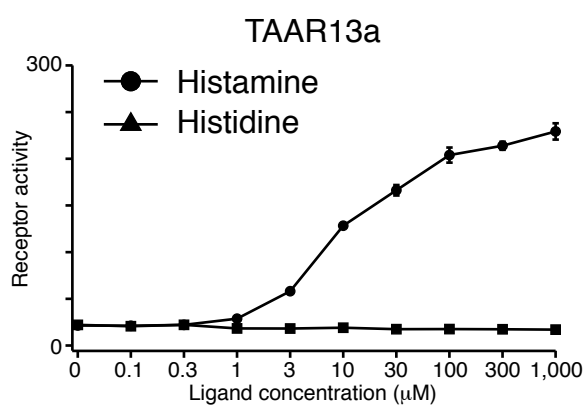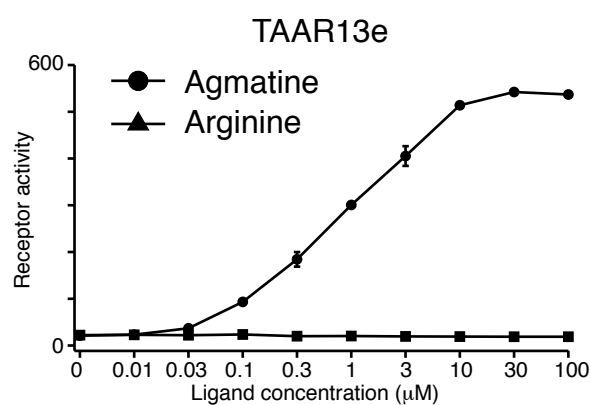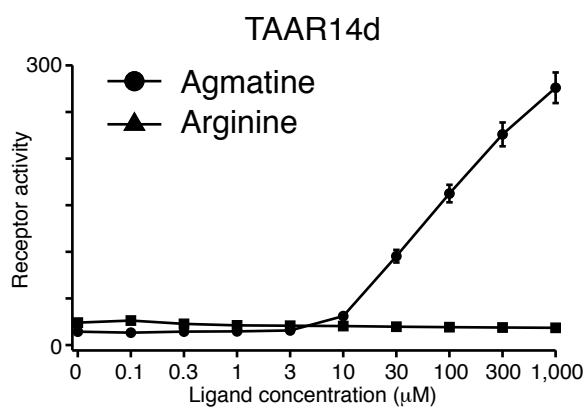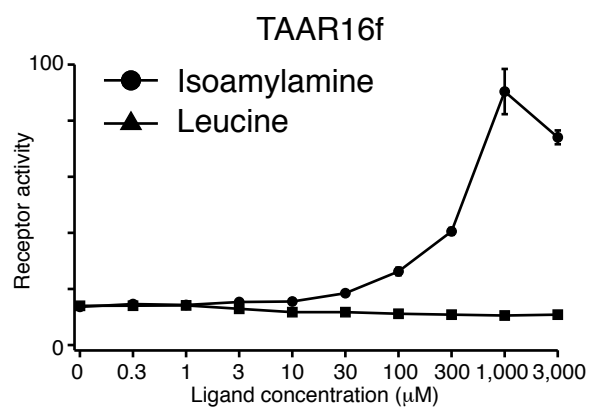

Figure 4-figure supplement 1

Supplement: supp [file elife_poa_e10441_Figure_4_figure_supplement_1.pdf › elife_poa_e10441_Figure_4_figure_supplement_1.pdf]

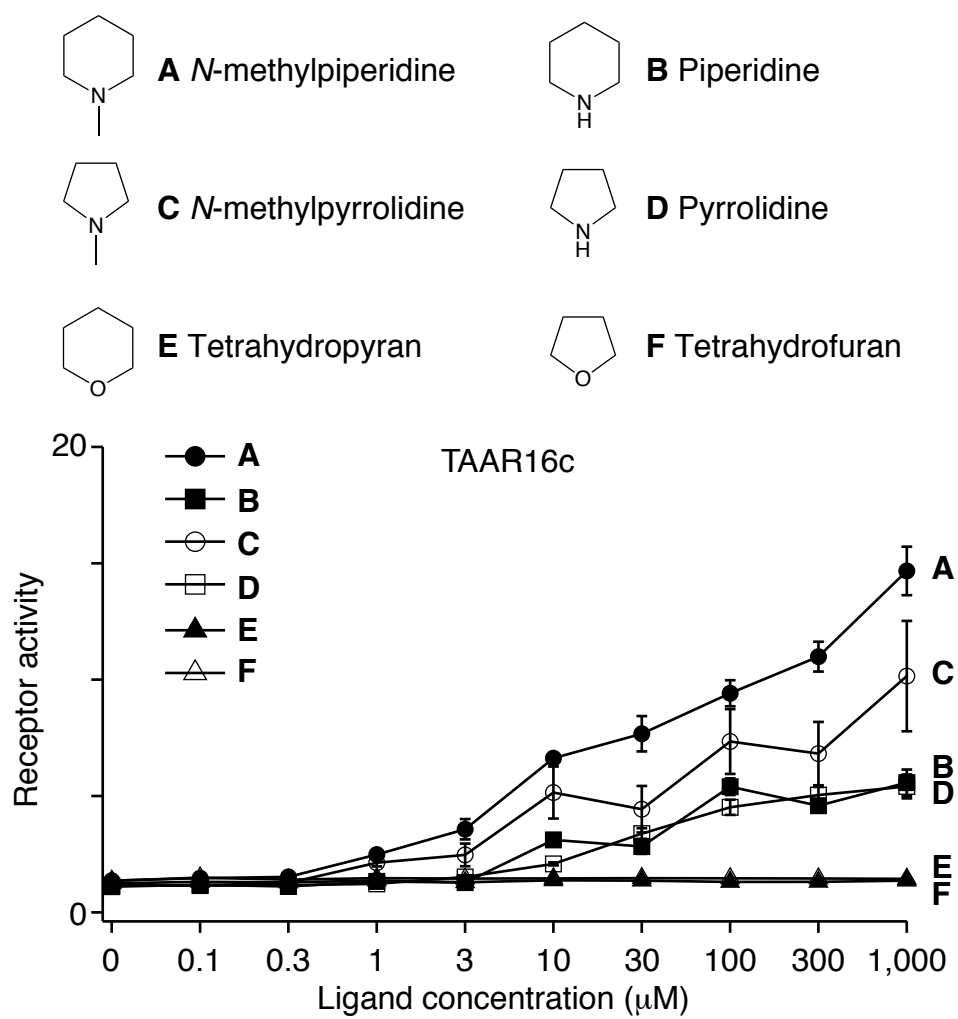

Figure 4-figure supplement 2

Supplement: supp [file elife_poa_e10441_Figure_4_figure_supplement_2.pdf › elife_poa_e10441_Figure_4_figure_supplement_2.pdf]

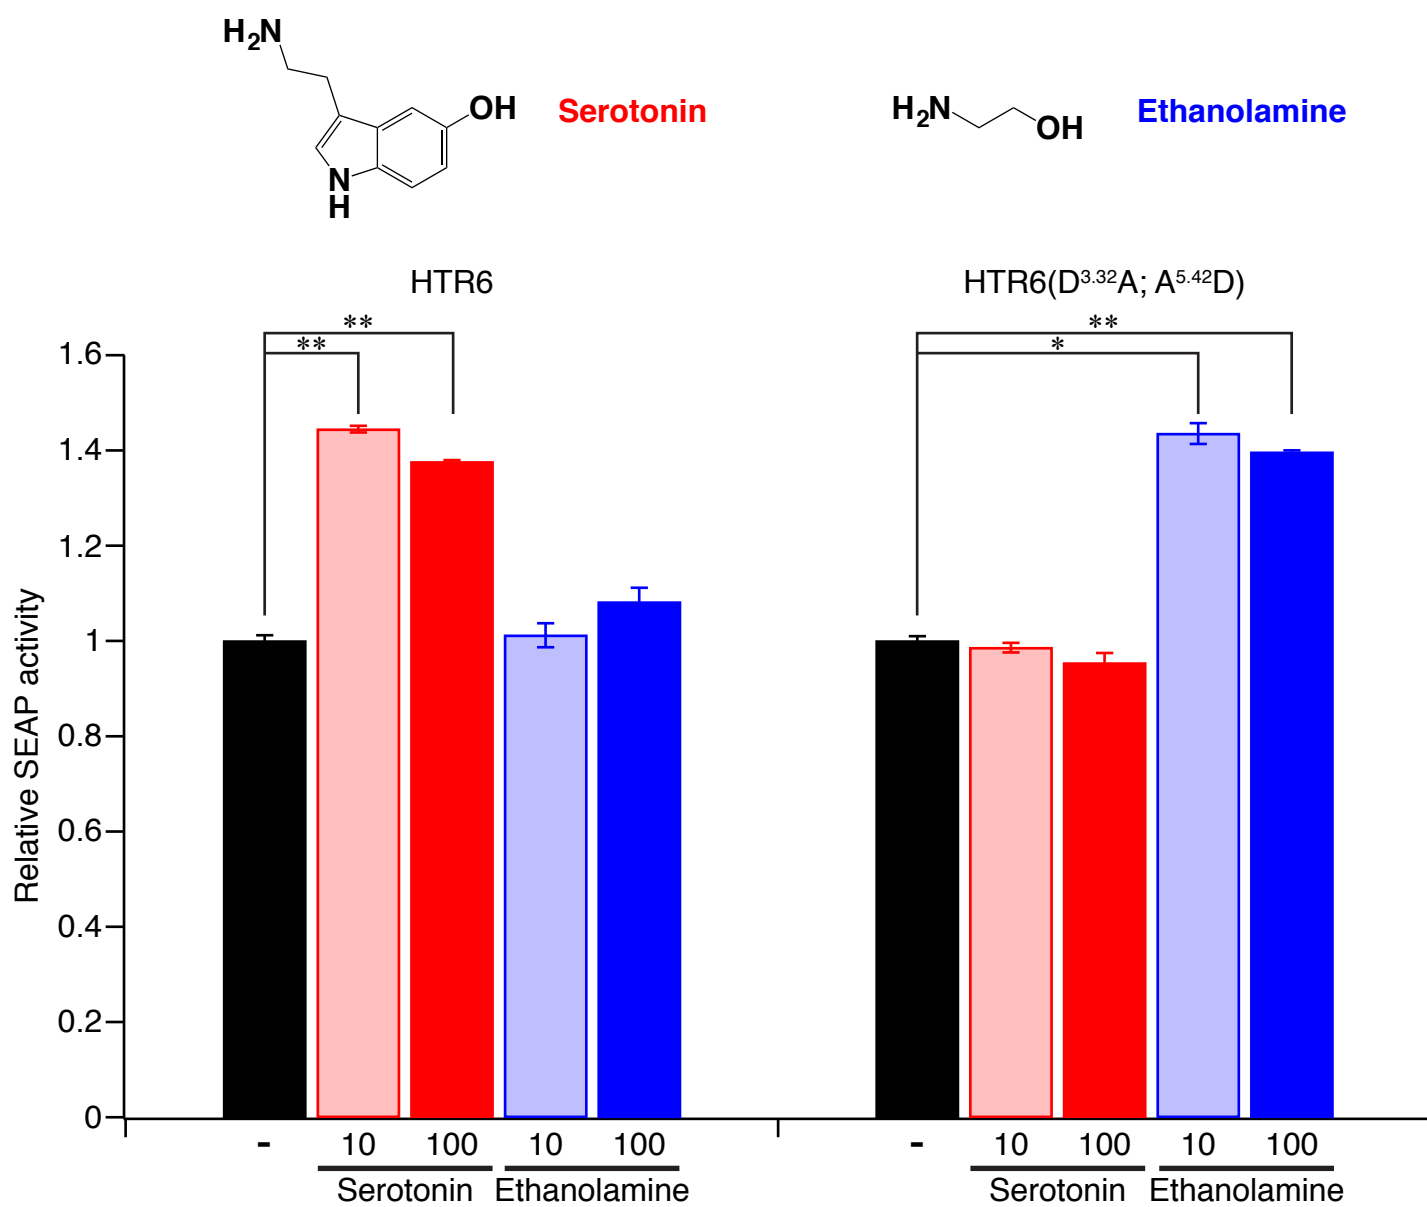

Figure 6-figure supplement 1

Supplement: supp [file elife_poa_e10441_Figure_6_figure_supplement_1.pdf › elife_poa_e10441_Figure_6_figure_supplement_1.pdf]
